# Supplementary material for: Opinion: Recent Developments and Future Directions in Studying the Chemistry of the Mesosphere and Lower Thermosphere
Source: Copernicus journal article supplement (doi:10.5194/egusphere-2023-680), 2023-04-21
Supplement: Supplementary file [file egusphere-2023-680-AC1-supplement.pdf]

John M. C. Plane, Jörg Gumbel, Konstantinos S. Kalogerakis, Daniel R. Marsh, and Christian von Savigny

## Response to the Referees

We thank both referees for a careful reading of the manuscript and for making a number of very helpful comments for improving it. The referees' comments are italicized, and our response is in normal typeface. In the revised manuscript, the changes are shown in blue typescript.

### Referee #1

*This paper summarizes developments in observing and understanding the composition and chemical reactions in the MLT over recent decades. There is little space given to the basic composition and dynamics of the MLT; instead, the paper assumes a working familiarity with those and focusses almost completely on recent or still unsolved aspects. The topic is broad and many details are mentioned only briefly but the authors provide an extensive list of references. The paper is very clearly written. For the most part it maintains a balance in the topics covered without undo emphasis on any particular aspect of the development.*

**Author response:** we are pleased that this referee considers that we have achieved a reasonable balance between topics. We have indeed assumed that the reader will have a working familiarity with the chemistry and physics of the MLT. Nevertheless, to take account of this and referee #2's comment about the "very short" introduction, we have now added Figure 1 which illustrates the location of the MLT and the processes affecting the chemistry and composition that are discussed in the paper. This figure is accompanied by a fairly detailed caption to introduce these topics. We have also added references to some recent review articles.

### Major comments

*Many of the works cited in Section 3 include explanations of the dynamically coupled or dynamically driven processes that lead to various outcomes, e.g. responses to solar variability, MJO, QBO, interhemispheric coupling, volcanic eruptions, trends. These explanations are repeated in the paper without judgement. In some cases, the statistics are poor because the temporal records are short (especially the solar cycle and volcanic eruption time series), the signals are weak and irregular, and the gravity waves that are involved in many interactions are poorly observed. It is appropriate to pass along the contents of other studies in a review such as this one. In the interest of caution, a more forceful recognition that verification of many of these mechanisms awaits additional data would be a good idea. As written, the accumulation of these reports gives the impression that the variability associated with external forcing and dynamical coupling on large spatial or temporal scales is better accepted and understood than is the case.*

**Author response:** we appreciate the referee's point here and agree that some statements could be more circumscribed. We have therefore softened some statements – where appropriate – following the referee's suggestion. In addition, we added some general comments to section 3 to point out that for some of the discussed effects the underlying processes are not well understood. It is worth reiterating that our focus here is on chemistry, and so recent findings on dynamics or forcings are discussed to the extent that these are important for our understanding of MLT composition and chemistry; however, it is beyond the scope of this paper to provide an in-depth discussion of these findings.

### Minor comments

*The section on future directions describes several measurement systems or global modeling advances that are still in planning stages or, even for those already collecting data, for which publications are not yet available. In order for readers to follow the progress in the months or years following initial publication, it would be useful to have web links for the individual programs.*

**Author response:** this is a good suggestion, and we have added links to appropriate websites for ongoing and upcoming missions where citable papers are not yet available:

AWE: <https://blogs.nasa.gov/awe>

ALTIUS: [https://www.esa.int/Applications/Observing\\_the\\_Earth/Altius](https://www.esa.int/Applications/Observing_the_Earth/Altius)

JPSS: <https://www.nesdis.noaa.gov/about/our-offices/joint-polar-satellite-system-jpss-program-office>

EISCAT\_3D: <https://www.eiscat.se/>

Meridian Space Weather Monitoring Project: <https://data.meridianproject.ac.cn/>

Midlatitude Allsky-imaging Network for GeoSpace Observations (MANGO):  
<https://www.mangonetwork.org>

The following references for high-resolution modelling have been added to the text: Chang et al., 2020; Hohenegger et al., 2023; Liu et al., 2014; Schwantes et al., 2022; Herrington et al., 2022. The following references have been added for upper atmospheric forecasting: Richter et al., 2022; McCormack et al., 2021.

### Editorial

*line 38: “mbar”, “mbar” Consider using SI units (Pascal) or at least use the same units for the two values being compared.*

**Author response:** changed to mbar, and added the pressure in Pascal.

*line 60-61: “Observations of NO and excited NO infrared emissions have been particularly useful in detecting the presence of atmospheric tides in the MLT.”*

*I think you mean the impact of tides on composition. The tides themselves are best detected from temperature and wind observations.*

**Author response:** changed to “impact”, as the referee suggests.

*line 135: “all the way to the MLT”*

**Author response:** changed to “all the way up to the MLT”

*line 520-521: “... the statistical significance of these trends remains limited”*

*This comes across as wishy-washy. Can you just say there is no significant trend?*

**Author response:** this statement is now extended to “Trends in the cloud brightness and cloud ice water content have been deduced from satellite observations (e.g., DeLand and Thomas (2015)), but

time series are affected by both solar variability and changes in stratospheric ozone, so the statistical significance of long-term trends remains limited.”

## Referee #2

*In this paper, an overview is provided in recent developments and future directions in the science of the Mesosphere and Lower Thermosphere (MLT) region. The MLT region is a highly interesting transition region between the lower and middle atmosphere, and the near-Earth space of the thermosphere-ionosphere-magnetosphere. As it is not directly accessible by measurement platforms apart from by sounding rocket, observations of the MLT region are difficult, and many aspects of MLT processes are still not well understood. However, a lot of progress has been made in the last two decades due to advances in observation techniques and the large number of satellite observations starting 2002, and the aim of the paper is to focus on these recent advances in a selection of topics. The paper provides a very short introduction defining the MLT region and its most important properties, and then discusses observations of the MLT region from different platforms followed by a wide area of different topics: the variability of the MLT regarding energetics, wave-driven dynamics, solar forcing, and long-term trends, airglow emissions and chemistry, the cosmic dust influx and the resulting metal chemistry and cosmic dust formation, and noctilucent clouds. It ends with a discussion of future directions. The paper thus provides an interesting overview of a highly relevant, fast developing field which I quite enjoyed reading.*

*As this is an opinion paper, the selection of topics discussed is by nature somewhat subjective, depending on the choices of the authors. I have summarized a few more references and further points below (“Topical”), however would like to emphasize that these are suggestions only. A few points in my opinion should be clarified before final publication, see “Major issues”, and a few minor and technical issues are listed at the end as well.*

### *Major issues:*

*The title and abstract are not very clear in the sense that they do not describe the content of the paper very well. I) the paper clearly deals with much more than just the chemistry of the MLT, covering topics like wave coupling, microphysics, and energetics, but actually not covering what I would call the photochemistry of the MLT driven by photolysis, photoionization and particle impact ionization, in great detail. You could just change the title and description in the abstract as well as in two more places listed in “Minor”. II) It is stated on the one hand that the paper reviews important advances over the past two decades, but with a focus on work during the past 10 years. This alleged focus is actually not clear in most of the subsections, which mainly discuss work done since 2000/2002, so in the last two decades.*

**Author response:** after some discussion between the authors, we would prefer to leave the title as it is in order to emphasise that our focus is on chemistry, but we have added the following statement in the Abstract: “Although the emphasis here is on chemistry, we also discuss recent findings on atmospheric dynamics and forcings, to the extent that these are important for understanding MLT composition and chemistry.”

It is Section 3 that contains most of the “physics” discussion, but this section provides a background on atmospheric variability and dynamics that is necessary to understand the composition and the chemical processes in the MLT. There are many examples in the MLT of local conditions that are dynamically controlled, chemically controlled, or controlled by a combination of both. A paper about the composition and chemistry of the MLT is thus not feasible without a description of relevant processes governing the dynamics and variability.

We have removed the statement about focusing on work in the past 10 years, in order to be consistent with opening sentence of the Abstract: "... with a review of important advances in the science of the Mesosphere and Lower Thermosphere (MLT) region of the atmosphere that have occurred over the past two decades ...".

*In the introduction, a very short definition and overview is given about what is the mesosphere, thermosphere, and MLT region. As the topic of the publication is on recent developments in MLT science and work during the past two decades, it would have been helpful for the non-expert reader to provide also a short summary of the state of the art 10 years ago as a starting point. Some of the following chapters have a short summary like this at the beginning (e.g., chapter 3.1 which deals only with research prior to 2005), but not all; maybe some starting point like this could be provided clearly at the beginning of all chapters, or in the introduction.*

**Author response:** we have added Figure 1 with a comprehensive figure caption, and some additional references to review articles within the past 20 years or so. These additions provide the reader with more background material in the Introduction. However, we think a general description of the state-of-the-art 20 years ago in this section, covering all topics, is not really feasible given the overall length of the article. Although not always explicit, we think the reader would understand that the studies that we have chosen to cite in each of the subsequent sections represent important advances over the state-of-the-art in each topic that existed 20+ years ago.

*Chapter 3.3, lines 217-220: the high-latitude MLT region is affected by particle impact ionization of precipitating protons and electrons which come from different sources. There are solar particles, mostly protons, from solar coronal mass ejections, but there are also auroral electrons -- solar wind particles accelerated in the magnetotail -- and electrons from the radiation belts and ring currents accelerated into the loss cone e.g., in geomagnetic storms. Geomagnetic storms can be initiated by solar coronal mass ejections CMEs, but also by corotating interaction regions CIRs. Reviews of this can be found, e.g., in Sinnhuber et al., Surv. Geophys., 2012; Mironova et al., Space Sci Rev., 2015; Baker et al., Space Sci Rev., 2018; Sinnhuber and Funke, in: The dynamic loss of Earth's radiation belts, Elsevier, 2020. Precipitation of solar energetic particles in solar proton events as mentioned here can have a spectacularly large impact on the chemical composition of the middle atmosphere, but mostly in the stratosphere and lower mesosphere; in the MLT region, geomagnetic storms and auroral substorms arguably have a larger impact on, e.g., the distributions of NO, upper mesosphere OH, auroral airglow, and temperature.*

**Author response:** we agree that the text implies that only CMEs initiate particle precipitation, when it should be describing geomagnetic storms in general. The text at the start of Section 3.4 has been revised to focus on the impact of these particles on the MLT, rather than what initiates their precipitation in geospace.

*Chapter 3.4: Solar coronal mass ejections and energetic particle precipitation have already been introduced, and their effects discussed to some extent, in Section 3.3, see my above comment. However, both here and in Chapter 3.3, the different sources of energetic particle precipitation are mixed up. This should be clarified; see my summary of sources in the comment above. Normally, "space weather" refers to the disturbances of the magnetosphere-ionosphere-thermosphere by high-speed solar wind, which could come from solar coronal holes, corotating interaction regions, or solar coronal mass ejections; some but by far not all solar coronal mass ejections come with high fluxes of high-energy protons > 10 MeV, and initiate solar proton events. You appear to refer to solar proton events in line 217 and lines 252-257, but than reference publications which deal with geomagnetic activity impacts by geomagnetic storms or auroral substorms without clarifying that these are*

*different types of events with different particle sources, particle energies, and temporal evolution: e.g., Fytterer et al 2015; Hendrickx et al., 2015 in lines 221-222; and Anderssen et al., 2014; Smith-Johnsen et al., 2018 in lines 258-259 deal with geomagnetic activity, but not with solar proton event; and in lines 259-262 MEE is discussed, which are likely related mainly to geomagnetic storms.*

**Author response:** the reference to “space weather” has been replaced with the more focussed “energetic particle impacts”.

*Topical:*

*Lines 58-59: there has also been interesting work on O<sub>2</sub> airglow emissions. E.g., the derivation of the O<sub>2</sub> emissivity from SCIAMACHY observations (Zarboo et al., AMT, 2018) has enabled a more precise observation of CO<sub>2</sub> from space (Sun et al., GRL, 2018; Bertaux et al., AMT, 2020). SCIAMACHY O<sub>2</sub> airglow observations have also been used to simultaneously derive O<sub>2</sub> emissivity and MLT temperatures (Sun et al., AMT, 2022).*

**Author response:** the studies mentioned by the referee represent interesting recent work related to O<sub>2</sub> airglow emissions and their application to remote sensing of greenhouse gases. However, GHG-remote sensing is outside the scope of our paper, and so we have not modified the manuscript to include these.

*Lines 60-63: NO number density is a clear tracer of atmospheric ionization in the upper mesosphere and lower thermosphere; the abundance of NO at low and midlatitudes above 80 km altitude clearly demonstrates the role of EUV photoionization, while at high latitudes, NO corresponds to geomagnetic forcing by electron precipitation in auroral substorms and geomagnetic storms (e.g., Marsh et al., JGR, 2004). Observations of NO density in the upper mesosphere and lower thermosphere have been carried out since 2002, e.g., by MIPAS/ENVISAT in the MA/UA modes (Bermejo-Pantaleon et al., JGR, 2011), by SCIAMACHY/ENVISAT (Bender et al., AMT, 2015; Bender et al., AMT, 2017), by ODIN/SMR (Sheese et al., JGR, 2013), ACE/FTS (Boon et al., 2005, 2013), and SNOE/AIM (Gordley et al., 2009; Hervig et al., 2019), and have been widely used to study particle impact ionization in the MLT region, e.g., showing a clear impact of geomagnetic forcing well into the mesosphere (e.g. Kirkwood et al., Ann. Geo., 2015; Hendrickx et al., JGR, 2015; Sinnhuber et al., JGR, 2016; Hendrickx et al., GRL, 2017; Smith-Johnsen et al., 2017; Kiviranta et al., ACP, 2018; Sinnhuber et al., JGR, 2022). A similar response to geomagnetic forcing has been found for OH based on observations from MLS/AURA in the high-latitude mesosphere (Verronen et al., 2011; Andersson et al., 2012; Fytterer et al., 2015). A response of mesospheric NO to geomagnetic storms and auroral substorms has also been observed by a ground-based microwave radiometer (Newnham et al., GRL, 2011; Newnham et al., JGR, 2015) (Section 2.3).*

**Author response:** indeed, in the original manuscript we did not properly cover measurements of NO from various platforms and their importance for quantifying and tracing space weather effects in the MLT. Following the referee’s suggestion, we have now added corresponding text both in Section 2.1 (Satellite Observations) and Section 3.4 (Energetic Particle Impacts).

*Lines 67–74: you could add the observations of MIPAS/ENVISAT here, which also observes CO<sub>2</sub> as well as CO, NO and T; though the full period of 10 years (2002-2012) of observations is only available for the nominal mode scanning up to 68 km, while the UA/MA modes scanning up to 170 km only started in 2005.*

**Author response:** a reference to MIPAS does not really fit into this paragraph, which is concerned with MLT observations over longer time periods than MIPAS can provide. MIPAS has contributed much to MLT research and we have added a reference earlier in this section.

*Section 2.1: radio occultation observations could be mentioned here as well, which provide global observations of electron density above ~80 km for the first time, e.g., from satellite instruments like FORMOSAT-3/COSMIC-1 (Wu et al., Remote Sensing, 2022), or a detailed view of sporadic E layers (e.g., Arras et al., Earth, Planets and Space, 2022).*

**Author response:** a sentence on sporadic E layer observations is now added at the end of Section 2.1

*Line 201: arguably at least as spectacular manifestations of wave coupling in the MLT are (I) Elevated Stratopause Events (ESEs), which are characterized by the re-formation of the stratopause at mesopause altitudes followed by the formation of a very strong and stable polar vortex with strong downwelling, after some SSWs (Manney et al., GRL, 2009; Orsolini et al., JGR, 2010; Siskind et al., JGR, 2010; Siskind et al., GRL, 2010; Thurairajah et al., JGR, 2010; Chandran et al., GRL, 2011; Ren et al., JGR, 2011; Limpasuvan et al., JASTP, 2012); (II) the fact that the impact of SSWs is observed even in the ionosphere (e.g., Chau et al., JGR, 2010; Goncharenko et al., GRL, 2010; Chau et al., Space Sci Rev, 2012; Goncharenko et al., GRL, 2021; Goncharenko et al., Frontiers, 2022)*

**Author response:** we prefer not to include these suggestions made by the referee. This is because the focus of the paper is on MLT chemistry, and so we want to restrict the discussion to how dynamics impacts chemistry. However, we have changed “The most spectacular manifestation” to the more correct “One of the most spectacular manifestations”.

*Lines 261-265: there are a number of observations and model studies showing a temperature response to geomagnetic activity, mostly related to geomagnetic storms, but also to SPEs (Tyssoy et al., JGR, 2010; Sun et al., Universe, 2022; Wang et al., JGR, 2021; Zou et al., Astrophys. J., 2020; Li et al., GRL, 2018; Liu et al., Atmosphere, 2018).*

**Author response:** we have now added a sentence in Section 3.4 describing the temperature response to geomagnetic activity.

Minor:

*Line 40: There is also a very steep temperature gradient from the mesopause into the lower thermosphere, with changes of several hundreds of K between 80 and 120 km.*

**Author response:** we agree (and this is in fact stated earlier in Section 1), but the temperature does not approach the temperature of a molten silicate particle.

*Line 85: small-scale “vertical” structures*

**Author response:** the same applies to small-scale horizontal structures, so we prefer not to differentiate.

*Line 158: photodissociation and dissociative ionization in the EUV of O2 and N2*

**Author response:** added “and indirectly by photoionization”

*Line 174-175: The gw-driven meridional overturning circulation controls the dynamics of the upper mesosphere; however, there is a turn-around of the zonal winds (e.g., Smith et al., Surv. Geophys., 2012) and meridional winds (e.g., Wang et al., JGR, 2022, Figure 1) around the mesopause which should separate the large-scale circulation patterns in the upper mesosphere from the lower*

*thermosphere. Large-scale transport of tracers from the lower thermosphere to the upper mesosphere appears unlikely, turbulent mixing appears more likely.*

**Author response:** we have added the following sentence which includes the Smith et al. (2012) reference suggested by the referee: “The same circulation pattern brings NO and CO from the thermosphere into the wintertime polar mesosphere and H<sub>2</sub>O and CO<sub>2</sub> upwards in the opposite pole (Garcia et al., 2014; Lossow et al., 2009; Smith, 2012).”

*Chapter 3.3, lines 212-216: the highly variable solar electromagnetic radiation in the EUV and soft x-ray range could be mentioned here as well, which is the source of the daytime ionospheric E-layer, and ionizes the daytime atmosphere down to around 80-90 km altitude.*

**Author response:** we now explicitly mention the importance of the solar cycles on vacuum and extreme ultraviolet (VUV, EUV) and soft x-rays.

*Line 222: observations of the 27-day signatures in mesospheric NO are also reported in Sinnhuber et al., JGR, 2016 and shown from model experiments in Fytterer et al., JGR, 2016. It should be noted that the 27-day signature found in NO and OH at high latitudes is likely mainly related to the 27-day signature in the solar wind, not in the electromagnetic spectrum. Insofar it might be more fitting to discuss these in the next section “Space weather impacts”.*

**Author response:** we added the Sinnhuber et al. (2016) reference here, and agree that some of the solar 27-day effects are caused by variations in EM radiation, as well as by variations in the particle fluxes. This is now explicitly mentioned, but we decided to keep all the 27-day effects in this section.

*Line 231-233:.... and EUV photoionization above 90 km*

**Author response:** we have added this phrase.

*Line 261: and Sinnhuber et al., JGR, 2022 (companion paper to Tyssoy et al., 2022)*

**Author response:** we have added this reference.

*Lines 381-383: ... and sporadic E-layers (in Section 5.2)*

**Author response:** done.

*Line 436-437: narrow layers of high concentrations of Fe<sup>+</sup> and Mg<sup>+</sup> ions and electrons*

**Author response:** done.

*Line 549: into the composition, energetics, and dynamics of the MLT, as there is discussion of e.g., gravity waves, NLCs and Airglow as well.*

**Author response:** we have added “energetics and dynamics” in parenthesis, to emphasise that these areas are not our primary focus. Section 7 already mentions future efforts concerning composition, energetics (thermal structure) and dynamics (transport processes and waves), because energetics and dynamics are relevant for the chemistry of the MLT.

*Lines 565-571: you could mention here also ESAs Earth Explorer 11 candidate mission The Changing-Atmosphere IR Tomography Explorer CAIRT (cairt.eu), an IR imager capable to simultaneously observe temperature and a large number of trace gases from the UTLS to the lower thermosphere with high spatial resolution, as a long-term perspective.*

**Author response:** information and a link about CAIRT as a possible future mission have been added.

*Lines 582-583: atomic oxygen at 63 mym has already been observed in the lower thermosphere from the CRISTA instrument on two space shuttle flights in 1994 and 1997 (Grossmann et al., GR,L 2000). Good to see that this method may be used again in the near future.*

**Author response:** this part of the paper concerns plans for future observations and we therefore list the references to Richter et al. and Yee et al. as most relevant. These papers in turn refer back to the original work by Grossmann et al. In fact, sounding rocket observations of 63 microns by Grossmann et al. date even further back than the measurements with CRISTA.

*Lines 595-601: There is also still the Network for the Detection of the Network for the Detection of Atmospheric Composition Change NDACC with some of the observations (e.g., by the microwave radiometers) reaching into the mesosphere (ndacc.larc.nasa.gov), and the Network for the Detection of Mesospheric Change NDMC (ndmc.dlr.de), which targets the mesopause region.*

*Line 723-724: see my comments above: the topic is much broader than chemistry, as it includes wave coupling, airglow, cosmic dust and noctilucent clouds.*

**Author response:** see the earlier responses – in this article we focus on chemistry, while including discussion of dynamics and forcings when these impact on chemistry and composition.

*Technical:*

*The paper would read better with using less brackets (). At least in the abstract (line 14-15, 16, 17-18), they should not be used.*

**Author response:** done

*Line 50: the acronym list is “at the end of the paper” – below suggests on this or the next page.*

**Author response:** done

*Line 54: that revealed “that” photochemistry dominates ...*

**Author response:** done

*Line 106: or “a” combination of both*

**Author response:** done

*Line 308: can you clarify what “high v” means? Instead of using this, you could write “ $v \geq 5$ (?)” here and in the following (e., line 312, line 347, ... ). That would be more precise.*

**Author response:** we have replaced OH(high v) by OH(high  $v \geq 5$ ).

*Line 342: Panka et al. (2017) appeared in ...*

**Author response:** replaced “appeared” by “published”.

Lines 340 and 341: we replaced “ $(n_3)$ ” by “ $(v_3)$ ”.
